# Supplementary material for: Early Warning Scores With and Without Artificial Intelligence
Source: PubMed Central journal article supplement (PMC11544488; doi:10.1001/jamanetworkopen.2024.38986), 2024-10-15
Supplement: jamanetwopen-e2438986-s001.pdf [file jamanetwopen-e2438986-s001.pdf]

## Supplementary Online Content

Edelson DP, Churpek MM, Carey KA, et al. Early warning scores with and without artificial intelligence. *JAMA Netw Open*. 2024;7(10):e2438986.  
doi:10.1001/jamanetworkopen.2024.38986

**eTable 1.** Model Overview

**eTable 2.** High-Level Comparison of Model Inputs

**eTable 3.** Area Under the Receiver Operator Characteristics (AUROC) Curve for Various Outcomes and Timelines

**eTable 4.** Detailed Observation-Level Test Characteristics

**eTable 5.** Detailed Encounter-Level Test Characteristics

**eFigure.** Receiver Operator Characteristics Curves

This supplementary material has been provided by the authors to give readers additional information about their work.

## eTable 1. Model Overview

YNHHS, Yale New Haven Health System; FDA, United States Food and Drug Administration.

| Name (Proprietor)                                                                     | Model specifics                                                                                                                                                                                                                                                                                                                                                                                         | Median Value (Range) | Notes                                                                                                                                                                    |
|---------------------------------------------------------------------------------------|---------------------------------------------------------------------------------------------------------------------------------------------------------------------------------------------------------------------------------------------------------------------------------------------------------------------------------------------------------------------------------------------------------|----------------------|--------------------------------------------------------------------------------------------------------------------------------------------------------------------------|
| Modified Early Warning Score (MEWS) <sup>1</sup>                                      | Developed by expert consensus. It requires only five inputs (heart rate, respiratory rate, systolic blood pressure, temperature, and responsiveness) and was intended to be calculated without a computer.                                                                                                                                                                                              | 1 (0 - 14)           | Most commonly used comparator. <sup>2</sup> Scores are whole numbers.                                                                                                    |
| National Early Warning Score (NEWS) (Royal College of Physicians, London, England)    | Consensus modified version of the ViEWS, <sup>3</sup> which was statistically derived using a linear logistic regression model and which is operationalized with whole numbers that can be summed at the bedside, similarly to the MEWS, with the addition of oxygen saturation and supplemental oxygenation. It has established thresholds for moderate (NEWS $\geq$ 5) and high-risk (NEWS $\geq$ 7). | 1 (0 - 20)           | NEWS was developed by the Royal College of Physicians and has been endorsed by the National Health Service in the United Kingdom. <sup>4</sup> Scores are whole numbers. |
| National Early Warning Score 2 (NEWS2) (Royal College of Physicians, London, England) | Consensus modified version of the NEWS which adds a measure of orientation and a separate SpO2 scale for patients with confirmed hypercarbic respiratory failure receiving supplemental oxygen. <sup>5</sup> It uses the same thresholds for moderate                                                                                                                                                   | 2 (0 - 20)           | NEWS2 was developed by the Royal College of Physicians and has been endorsed by the National Health Service in the United Kingdom.                                       |

<sup>1</sup> Subbe C, Kruger M, Rutherford P, Gemmel L. Validation of a modified Early Warning Score in medical admissions. *QJM*. 2001;94(10):521-6. doi:10.1093/qjmed/94.10.521

<sup>2</sup> Gerry S, Bonnici T, Birks J, et al. Early warning scores for detecting deterioration in adult hospital patients: systematic review and critical appraisal of methodology. *BMJ*. 2020;369:m1501. doi:10.1136/bmj.m1501

<sup>3</sup> Prytherch D, Smith G, Schmidt P, Featherstone P. ViEWS--Towards a national early warning score for detecting adult inpatient deterioration. *Resuscitation*. 2010;81(8):932-7. doi:10.1016/j.resuscitation.2010.04.014

<sup>4</sup> Smith G, Prytherch D, Meredith P, Schmidt P, Featherstone P. The ability of the National Early Warning Score (NEWS) to discriminate patients at risk of early cardiac arrest, unanticipated intensive care unit admission, and death. *Resuscitation*. 2013;84(4):465-70. doi:10.1016/j.resuscitation.2012.12.016

<sup>5</sup> Juniper M. NEWS2, patient safety and hypercapnic respiratory failure. *Clinical Medicine*. 2022;22(6):518-521. doi:10.7861/clinmed.2022-0352

| Name (Proprietor)                                         | Model specifics                                                                                                                                                                                                                                                                                                                                                                                                                   | Median Value (Range) | Notes                                                                                                                                                                                                                                              |
|-----------------------------------------------------------|-----------------------------------------------------------------------------------------------------------------------------------------------------------------------------------------------------------------------------------------------------------------------------------------------------------------------------------------------------------------------------------------------------------------------------------|----------------------|----------------------------------------------------------------------------------------------------------------------------------------------------------------------------------------------------------------------------------------------------|
|                                                           | (NEWS2 $\geq$ 5) and high-risk (NEWS2 $\geq$ 7) as NEWS.                                                                                                                                                                                                                                                                                                                                                                          |                      | Scores are whole numbers.                                                                                                                                                                                                                          |
| Rothman Index (RI) (Spacelabs Healthcare, Snoqualmie, WA) | Heuristic model based on the aggregated 1-year mortality risk of 26 variables. <sup>6</sup>                                                                                                                                                                                                                                                                                                                                       | 63 (-58 - 100)       | The algorithm received FDA 510(k) marketing clearance (K172959) in 2018. YNHHS turned RI on in production across the health system in 2011. Scores can be whole numbers or decimals, ranging from negative to positive.                            |
| Deterioration Index (EDI) (Epic Systems, Verona, WI)      | Ordinal logistic regression model based on 17 variables, which was trained to predict mortality within 38 hours or deterioration (defined as ICU transfer, rapid response team (RRT) activation or code blue) within 12 hours. <sup>7</sup>                                                                                                                                                                                       | 31.1 (0 - 98.94)     | YNHHS turned on EDI in March 2019, scoring every 20 minutes, and ran it alongside RI during the study period with scores and trends visible to clinicians for both scores within the electronic health record. Scores can be integers or decimals. |
| eCARTv5 (AgileMD, San Francisco, CA)                      | Gradient-boosted machine learning (GBM) model that uses 97 variables (including 41 vital sign and laboratory value trends). <sup>8</sup> The model was trained in a derivation cohort of 901,491 encounters to predict ward death or direct ward-to-ICU transfer within 8 hours and validated in an independent dataset of 1,975,407 encounters from three health systems, of which Yale New Haven Health System (YNHHS) was one. | 44 (0-100)           | eCARTv5 received FDA 510(k) clearance (K233253) in June 2024. Scores are integers from 0-99 and can have one or two decimal places between 99 and 100.                                                                                             |

<sup>6</sup> Rothman MJ, Rothman SI, Beals J 4th. Development and validation of a continuous measure of patient condition using the Electronic Medical Record. *J Biomed Inform.* 2013;46(5):837-848. doi:10.1016/j.jbi.2013.06.011

<sup>7</sup> Epic Systems Corporation. *Galaxy - Cognitive Computing Model Brief: Deterioration Index.* Accessed Aug 21, 2023.

<sup>8</sup> [https://www.accessdata.fda.gov/cdrh\\_docs/pdf23/K233253.pdf](https://www.accessdata.fda.gov/cdrh_docs/pdf23/K233253.pdf)

**Workflow note:** For all seven campuses, EDI and RI scores and trend views were visible after scrolling in the Epic Storyboard and could be found in flowsheet documentation, which could then be added to patient lists. In addition, three of the campuses had mobile alerts going to their RRT nurses from the start of the study for “High” and “Very High” RI alerts which were then transitioned to EDI mobile alerts in March 2022 (Campus E) and November 2023 (Campuses A and G), using a threshold of  $\geq 50$  or single parameter alerts for oxygen saturation  $\leq 85$  or systolic blood pressure  $\leq 70$ . Campus D mobile alerts were also enabled in November 2023 but the other three campuses (B, C and F) never fired mobile alerts during the study period.

**eTable 2.** High-Level Comparison of Model Inputs

| Model Variable            | Variable Type       | MEWS | NEWS | NEWS2 | RI | EDI | eCART |
|---------------------------|---------------------|------|------|-------|----|-----|-------|
| Heart Rate                | VITALS              | ✓    | ✓    | ✓     | ✓  | ✓   | ✓     |
| Respiratory Rate          | VITALS              | ✓    | ✓    | ✓     | ✓  | ✓   | ✓     |
| Systolic BP               | VITALS              | ✓    | ✓    | ✓     | ✓  | ✓   | ✓     |
| Temperature               | VITALS              | ✓    | ✓    | ✓     | ✓  | ✓   | ✓     |
| Responsiveness/GCS        | NURSING ASSESSMENTS | ✓    | ✓    | ✓     | ✓  | ✓   | ✓     |
| O2 Sat                    | VITALS              |      | ✓    | ✓     | ✓  | ✓   | ✓     |
| Orientation               | NURSING ASSESSMENTS |      |      | ✓     | ✓  | ✓   | ✓     |
| FiO2/ Supplemental Oxygen | NURSING ASSESSMENTS |      | ✓    | ✓     |    | ✓   | ✓     |
| BUN                       | LABORATORY VALUES   |      |      |       | ✓  | ✓   | ✓     |
| Hemoglobin/Hematocrit     | LABORATORY VALUES   |      |      |       | ✓  | ✓   | ✓     |
| Potassium                 | LABORATORY VALUES   |      |      |       | ✓  | ✓   | ✓     |
| Sodium                    | LABORATORY VALUES   |      |      |       | ✓  | ✓   | ✓     |
| WBC                       | LABORATORY VALUES   |      |      |       | ✓  | ✓   | ✓     |
| Cardiac                   | NURSING ASSESSMENTS |      |      |       | ✓  | ✓   |       |
| Diastolic BP              | VITALS              |      |      |       | ✓  |     | ✓     |
| Chloride                  | LABORATORY VALUES   |      |      |       | ✓  |     | ✓     |
| Creatinine                | LABORATORY VALUES   |      |      |       | ✓  |     | ✓     |
| Braden Score              | NURSING ASSESSMENTS |      |      |       | ✓  |     | ✓     |
| Food/Nutrition            | NURSING ASSESSMENTS |      |      |       | ✓  |     |       |
| Gastrointestinal          | NURSING ASSESSMENTS |      |      |       | ✓  |     |       |
| Genitourinary             | NURSING ASSESSMENTS |      |      |       | ✓  |     |       |
| Musculoskeletal           | NURSING ASSESSMENTS |      |      |       | ✓  |     |       |
| Peripheral Vascular       | NURSING ASSESSMENTS |      |      |       | ✓  |     |       |
| Psychosocial              | NURSING ASSESSMENTS |      |      |       | ✓  |     |       |
| Respiratory               | NURSING ASSESSMENTS |      |      |       | ✓  |     |       |
| Safety                    | NURSING ASSESSMENTS |      |      |       | ✓  |     |       |
| Skin                      | NURSING ASSESSMENTS |      |      |       | ✓  |     |       |
| pH (ABG & VBG)            | LABORATORY VALUES   |      |      |       |    | ✓   | ✓     |
| Platelet Count            | LABORATORY VALUES   |      |      |       |    | ✓   | ✓     |
| Age                       | DEMOGRAPHICS        |      |      |       |    | ✓   | ✓     |
| BMI                       | NURSING ASSESSMENTS |      |      |       |    |     | ✓     |
| Urine Output              | NURSING ASSESSMENTS |      |      |       |    |     | ✓     |
| Albumin                   | LABORATORY VALUES   |      |      |       |    |     | ✓     |
| Alk Phos                  | LABORATORY VALUES   |      |      |       |    |     | ✓     |
| Anion Gap                 | LABORATORY VALUES   |      |      |       |    |     | ✓     |
| aPTT                      | LABORATORY VALUES   |      |      |       |    |     | ✓     |
| Bands                     | LABORATORY VALUES   |      |      |       |    |     | ✓     |
| Bicarbonate               | LABORATORY VALUES   |      |      |       |    |     | ✓     |
| Bilirubin                 | LABORATORY VALUES   |      |      |       |    |     | ✓     |
| Calcium                   | LABORATORY VALUES   |      |      |       |    |     | ✓     |
| Eosinophils               | LABORATORY VALUES   |      |      |       |    |     | ✓     |
| Glucose                   | LABORATORY VALUES   |      |      |       |    |     | ✓     |
| INR                       | LABORATORY VALUES   |      |      |       |    |     | ✓     |
| Lactate                   | LABORATORY VALUES   |      |      |       |    |     | ✓     |
| Lipase                    | LABORATORY VALUES   |      |      |       |    |     | ✓     |

| Model Variable       | Variable Type     | MEWS | NEWS | NEWS2 | RI | EDI | eCART |
|----------------------|-------------------|------|------|-------|----|-----|-------|
| Lymphocytes          | LABORATORY VALUES |      |      |       |    |     | ✓     |
| Magnesium            | LABORATORY VALUES |      |      |       |    |     | ✓     |
| MCV                  | LABORATORY VALUES |      |      |       |    |     | ✓     |
| Monocytes            | LABORATORY VALUES |      |      |       |    |     | ✓     |
| Neutrophils          | LABORATORY VALUES |      |      |       |    |     | ✓     |
| pCO2 (ABG & VBG)     | LABORATORY VALUES |      |      |       |    |     | ✓     |
| Phosphate            | LABORATORY VALUES |      |      |       |    |     | ✓     |
| pO2 (ABG)            | LABORATORY VALUES |      |      |       |    |     | ✓     |
| RDW                  | LABORATORY VALUES |      |      |       |    |     | ✓     |
| SGOT/AST             | LABORATORY VALUES |      |      |       |    |     | ✓     |
| Total Protein        | LABORATORY VALUES |      |      |       |    |     | ✓     |
| ICU During Encounter | ADMINISTRATIVE    |      |      |       |    |     | ✓     |
| Length of Stay       | ADMINISTRATIVE    |      |      |       |    |     | ✓     |
| Time of Day          | ADMINISTRATIVE    |      |      |       |    |     | ✓     |

MEWS, Modified Early Warning Score; NEWS, National Early Warning Score; RI, Rothman Index; EDI, Epic Deterioration Index; eCART, eCARTv5.

**eTable 3.** Area Under the Receiver Operator Characteristics (AUROC) Curve for Various Outcomes and Timelines

| Outcome       | Score | Timeline             |                      |                      |
|---------------|-------|----------------------|----------------------|----------------------|
|               |       | 12 hour              | 24 hour              | 48 hour              |
| Deterioration | MEWS  | 0.772 (0.764, 0.781) | 0.757 (0.750, 0.764) | 0.741 (0.736, 0.747) |
|               | EDI   | 0.810 (0.806, 0.818) | 0.808 (0.802, 0.812) | 0.804 (0.800, 0.808) |
|               | NEWS  | 0.837 (0.830, 0.843) | 0.829 (0.824, 0.835) | 0.822 (0.818, 0.826) |
|               | NEWS2 | 0.837 (0.831, 0.843) | 0.831 (0.826, 0.836) | 0.826 (0.822, 0.830) |
|               | RI    | 0.827 (0.821, 0.833) | 0.828 (0.823, 0.834) | 0.831 (0.827, 0.835) |
|               | eCART | 0.906 (0.901, 0.911) | 0.895 (0.891, 0.900) | 0.885 (0.882, 0.888) |
| Mortality     | MEWS  | 0.886 (0.873, 0.896) | 0.867 (0.859, 0.875) | 0.838 (0.833, 0.846) |
|               | EDI   | 0.913 (0.906, 0.921) | 0.905 (0.898, 0.912) | 0.891 (0.887, 0.897) |
|               | NEWS  | 0.932 (0.922, 0.939) | 0.921 (0.915, 0.927) | 0.902 (0.897, 0.907) |
|               | NEWS2 | 0.937 (0.930, 0.944) | 0.928 (0.923, 0.932) | 0.912 (0.908, 0.917) |
|               | RI    | 0.952 (0.947, 0.957) | 0.947 (0.944, 0.951) | 0.939 (0.936, 0.941) |
|               | eCART | 0.963 (0.958, 0.967) | 0.956 (0.952, 0.960) | 0.945 (0.942, 0.949) |

MEWS, Modified Early Warning Score; NEWS, National Early Warning Score; RI, Rothman Index; EDI, Epic Deterioration Index; eCART, eCARTv5.

**eTable 4.** Detailed Observation-Level Test Characteristics

| Score | Threshold | Positivity rate   | Sensitivity       | Specificity       | PPV               | NPV               |
|-------|-----------|-------------------|-------------------|-------------------|-------------------|-------------------|
| eCART | 82        | 9.4 (9.3, 9.4)    | 70.3 (69.3, 71.2) | 91.3 (91.2, 91.4) | 8.3 (8.1, 8.5)    | 99.6 (99.6, 99.7) |
|       | 83        | 8.8 (8.7, 8.9)    | 69.3 (68.2, 70.2) | 91.9 (91.8, 91.9) | 8.7 (8.5, 8.9)    | 99.6 (99.6, 99.6) |
|       | 84        | 8.3 (8.2, 8.3)    | 68.2 (67, 69.2)   | 92.4 (92.4, 92.5) | 9.1 (8.9, 9.4)    | 99.6 (99.6, 99.6) |
|       | 85        | 7.7 (7.6, 7.8)    | 66.9 (65.7, 67.9) | 93 (92.9, 93)     | 9.6 (9.4, 9.8)    | 99.6 (99.6, 99.6) |
|       | 86        | 7.2 (7.1, 7.2)    | 65.7 (64.4, 66.7) | 93.5 (93.4, 93.5) | 10.2 (9.9, 10.4)  | 99.6 (99.6, 99.6) |
|       | 87        | 6.6 (6.6, 6.7)    | 64.3 (63.1, 65.3) | 94 (93.9, 94.1)   | 10.7 (10.4, 10.9) | 99.6 (99.6, 99.6) |
|       | 88        | 6.1 (6.1, 6.2)    | 62.9 (61.8, 64.1) | 94.5 (94.4, 94.6) | 11.3 (11, 11.6)   | 99.6 (99.5, 99.6) |
|       | 89        | 5.6 (5.6, 5.7)    | 61.4 (60.3, 62.7) | 95 (94.9, 95)     | 12.1 (11.7, 12.4) | 99.5 (99.5, 99.6) |
|       | 90        | 5.2 (5.1, 5.2)    | 59.9 (58.8, 61.2) | 95.5 (95.4, 95.5) | 12.9 (12.5, 13.2) | 99.5 (99.5, 99.6) |
|       | 91        | 4.7 (4.6, 4.7)    | 58.2 (57, 59.4)   | 95.9 (95.9, 96)   | 13.7 (13.4, 14.1) | 99.5 (99.5, 99.5) |
|       | 92        | 4.2 (4.2, 4.3)    | 56.4 (55.2, 57.7) | 96.4 (96.3, 96.4) | 14.8 (14.4, 15.1) | 99.5 (99.5, 99.5) |
|       | 93        | 3.8 (3.7, 3.8)    | 54.4 (53.1, 55.7) | 96.8 (96.8, 96.8) | 15.9 (15.5, 16.4) | 99.5 (99.5, 99.5) |
|       | 94        | 3.3 (3.3, 3.4)    | 52.2 (51, 53.4)   | 97.2 (97.2, 97.3) | 17.3 (16.9, 17.8) | 99.5 (99.4, 99.5) |
|       | 95        | 2.9 (2.8, 2.9)    | 49.6 (48.4, 50.9) | 97.6 (97.6, 97.7) | 19 (18.5, 19.5)   | 99.4 (99.4, 99.5) |
|       | 96        | 2.4 (2.4, 2.5)    | 46.4 (45, 47.5)   | 98 (98, 98.1)     | 20.9 (20.3, 21.5) | 99.4 (99.4, 99.4) |
|       | 97        | 2 (2, 2)          | 42.5 (41.4, 43.9) | 98.4 (98.4, 98.5) | 23.3 (22.7, 24.2) | 99.4 (99.3, 99.4) |
|       | 98        | 1.6 (1.5, 1.6)    | 37.2 (36.1, 38.6) | 98.8 (98.8, 98.9) | 26.5 (25.7, 27.4) | 99.3 (99.3, 99.3) |
|       | 99        | 1 (1, 1.1)        | 28.8 (27.9, 30.3) | 99.3 (99.3, 99.3) | 30.9 (29.7, 32)   | 99.2 (99.2, 99.2) |
| EDI   | 34        | 27.7 (27.6, 27.8) | 73.3 (72.3, 74.2) | 72.8 (72.7, 72.9) | 2.9 (2.8, 3)      | 99.6 (99.6, 99.6) |
|       | 35        | 23.8 (23.7, 23.9) | 69.9 (68.8, 70.8) | 76.7 (76.7, 76.8) | 3.2 (3.2, 3.3)    | 99.6 (99.5, 99.6) |
|       | 36        | 20.3 (20.2, 20.3) | 66.5 (65.4, 67.4) | 80.2 (80.2, 80.3) | 3.6 (3.5, 3.7)    | 99.5 (99.5, 99.6) |
|       | 37        | 17.2 (17.2, 17.3) | 63.2 (62.1, 64.2) | 83.3 (83.2, 83.4) | 4.1 (3.9, 4.1)    | 99.5 (99.5, 99.5) |
|       | 38        | 14.6 (14.5, 14.7) | 60 (58.7, 61)     | 85.9 (85.8, 86)   | 4.5 (4.4, 4.7)    | 99.5 (99.5, 99.5) |
|       | 39        | 12.4 (12.3, 12.4) | 56.6 (55.6, 57.8) | 88.1 (88.1, 88.2) | 5.1 (4.9, 5.2)    | 99.5 (99.4, 99.5) |
|       | 40        | 10.5 (10.4, 10.6) | 53.6 (52.6, 54.9) | 90 (89.9, 90)     | 5.6 (5.5, 5.8)    | 99.4 (99.4, 99.4) |



| Score | Threshold | Positivity rate   | Sensitivity       | Specificity       | PPV               | NPV               |
|-------|-----------|-------------------|-------------------|-------------------|-------------------|-------------------|
|       | 41        | 8.9 (8.9, 9)      | 50.7 (49.4, 51.9) | 91.5 (91.5, 91.6) | 6.3 (6.1, 6.4)    | 99.4 (99.4, 99.4) |
|       | 42        | 7.7 (7.6, 7.7)    | 47.9 (46.5, 49.1) | 92.8 (92.7, 92.9) | 6.9 (6.7, 7.1)    | 99.4 (99.4, 99.4) |
|       | 43        | 6.6 (6.5, 6.6)    | 45.1 (43.8, 46.3) | 93.8 (93.8, 93.9) | 7.6 (7.3, 7.8)    | 99.3 (99.3, 99.4) |
|       | 44        | 5.7 (5.7, 5.8)    | 42.7 (41.3, 43.8) | 94.7 (94.6, 94.7) | 8.2 (8, 8.5)      | 99.3 (99.3, 99.3) |
|       | 45        | 5 (4.9, 5)        | 40.4 (39.1, 41.6) | 95.4 (95.4, 95.5) | 8.9 (8.6, 9.2)    | 99.3 (99.3, 99.3) |
|       | 46        | 4.4 (4.3, 4.4)    | 38 (36.9, 39)     | 96 (96, 96.1)     | 9.6 (9.3, 10)     | 99.3 (99.3, 99.3) |
|       | 47        | 3.9 (3.8, 3.9)    | 35.9 (34.8, 37)   | 96.5 (96.5, 96.5) | 10.3 (9.9, 10.6)  | 99.3 (99.2, 99.3) |
|       | 48        | 3.4 (3.4, 3.5)    | 33.9 (33, 34.9)   | 96.9 (96.9, 97)   | 10.9 (10.5, 11.3) | 99.2 (99.2, 99.3) |
|       | 49        | 3.1 (3, 3.1)      | 32 (31.1, 33)     | 97.3 (97.2, 97.3) | 11.6 (11.1, 12)   | 99.2 (99.2, 99.2) |
|       | 50        | 2.7 (2.7, 2.8)    | 30.2 (29, 31.2)   | 97.6 (97.5, 97.6) | 12.2 (11.7, 12.6) | 99.2 (99.2, 99.2) |
|       | 51        | 2.5 (2.4, 2.5)    | 28.5 (27.6, 29.6) | 97.8 (97.8, 97.8) | 12.7 (12.3, 13.2) | 99.2 (99.2, 99.2) |
|       | 52        | 2.2 (2.2, 2.3)    | 26.9 (26.1, 28.1) | 98 (98, 98.1)     | 13.3 (12.9, 13.9) | 99.2 (99.2, 99.2) |
|       | 53        | 2 (2, 2.1)        | 25.4 (24.6, 26.5) | 98.2 (98.2, 98.3) | 13.9 (13.4, 14.5) | 99.2 (99.1, 99.2) |
|       | 54        | 1.8 (1.8, 1.9)    | 24.2 (23.4, 25.2) | 98.4 (98.4, 98.4) | 14.5 (14, 15.2)   | 99.1 (99.1, 99.2) |
|       | 55        | 1.7 (1.7, 1.7)    | 22.8 (21.9, 23.8) | 98.6 (98.5, 98.6) | 15 (14.5, 15.7)   | 99.1 (99.1, 99.2) |
|       | 56        | 1.5 (1.5, 1.6)    | 21.7 (20.7, 22.7) | 98.7 (98.7, 98.7) | 15.6 (15, 16.4)   | 99.1 (99.1, 99.1) |
|       | 57        | 1.4 (1.4, 1.4)    | 20.6 (19.7, 21.7) | 98.8 (98.8, 98.8) | 16.2 (15.6, 17.1) | 99.1 (99.1, 99.1) |
|       | 58        | 1.3 (1.3, 1.3)    | 19.5 (18.6, 20.5) | 98.9 (98.9, 98.9) | 16.9 (16.1, 17.7) | 99.1 (99.1, 99.1) |
|       | 59        | 1.2 (1.1, 1.2)    | 18.6 (17.7, 19.4) | 99 (99, 99)       | 17.5 (16.7, 18.4) | 99.1 (99.1, 99.1) |
| MEWS  | 2         | 20.9 (20.8, 21)   | 65.7 (64.4, 67)   | 79.6 (79.5, 79.7) | 3.5 (3.4, 3.6)    | 99.5 (99.5, 99.5) |
|       | 3         | 5.9 (5.8, 5.9)    | 43.7 (42.5, 44.9) | 94.6 (94.5, 94.6) | 8.2 (8, 8.5)      | 99.3 (99.3, 99.4) |
|       | 4         | 1.8 (1.8, 1.8)    | 27.6 (26.4, 28.6) | 98.5 (98.5, 98.5) | 16.9 (16.2, 17.5) | 99.2 (99.2, 99.2) |
|       | 5         | 0.7 (0.7, 0.7)    | 16.3 (15.6, 17.3) | 99.5 (99.5, 99.5) | 26 (24.8, 27.3)   | 99.1 (99, 99.1)   |
| NEWS  | 3         | 20.5 (20.4, 20.5) | 73.5 (72.3, 74.4) | 80.1 (80, 80.2)   | 4 (3.9, 4)        | 99.6 (99.6, 99.6) |
|       | 4         | 10.9 (10.8, 10.9) | 62 (61, 63.1)     | 89.7 (89.6, 89.8) | 6.3 (6.2, 6.5)    | 99.5 (99.5, 99.6) |
|       | 5         | 6 (5.9, 6)        | 51.5 (50.4, 52.8) | 94.5 (94.5, 94.6) | 9.5 (9.3, 9.8)    | 99.4 (99.4, 99.5) |

| Score | Threshold      | Positivity rate   | Sensitivity       | Specificity       | PPV               | NPV               |
|-------|----------------|-------------------|-------------------|-------------------|-------------------|-------------------|
|       | 6              | 3.2 (3.2, 3.3)    | 40.7 (39.6, 42.4) | 97.2 (97.2, 97.2) | 14 (13.5, 14.4)   | 99.3 (99.3, 99.4) |
|       | 7              | 1.8 (1.8, 1.8)    | 31.5 (30.7, 32.9) | 98.5 (98.5, 98.5) | 19.1 (18.5, 20)   | 99.2 (99.2, 99.3) |
|       | 8              | 1.1 (1.1, 1.1)    | 23.8 (22.9, 25.3) | 99.2 (99.2, 99.2) | 24.5 (23.5, 25.6) | 99.1 (99.1, 99.2) |
| NEWS2 | 4              | 18.8 (18.7, 18.9) | 70.8 (69.9, 71.9) | 81.8 (81.7, 81.9) | 4.2 (4.1, 4.3)    | 99.6 (99.6, 99.6) |
|       | 5              | 11.3 (11.2, 11.4) | 61.1 (60, 62.2)   | 89.2 (89.2, 89.3) | 6 (5.8, 6.1)      | 99.5 (99.5, 99.5) |
|       | 6              | 6.3 (6.3, 6.4)    | 50.1 (49, 51.4)   | 94.2 (94.1, 94.2) | 8.7 (8.5, 9)      | 99.4 (99.4, 99.4) |
|       | 7              | 3.6 (3.6, 3.7)    | 39.9 (38.8, 41.1) | 96.8 (96.7, 96.8) | 12.1 (11.7, 12.6) | 99.3 (99.3, 99.3) |
|       | 8              | 2.1 (2.1, 2.2)    | 30.5 (29.6, 32.1) | 98.2 (98.1, 98.2) | 15.8 (15.1, 16.4) | 99.2 (99.2, 99.2) |
|       | 9              | 1.2 (1.2, 1.2)    | 22.4 (21.4, 23.5) | 99.1 (99, 99.1)   | 21 (19.9, 21.9)   | 99.1 (99.1, 99.2) |
| RI    | 20             | 1.2 (1.2, 1.2)    | 22.5 (21.8, 23.4) | 99 (99, 99)       | 20.2 (19.5, 21.2) | 99.1 (99.1, 99.2) |
|       | 21             | 1.4 (1.3, 1.4)    | 23.9 (23.1, 24.8) | 98.9 (98.9, 98.9) | 19.3 (18.7, 20.2) | 99.1 (99.1, 99.2) |
|       | 22             | 1.5 (1.5, 1.5)    | 25.2 (24.4, 26.3) | 98.8 (98.7, 98.8) | 18.5 (17.8, 19.2) | 99.2 (99.1, 99.2) |
|       | 23             | 1.7 (1.7, 1.7)    | 26.6 (25.7, 27.6) | 98.6 (98.6, 98.6) | 17.5 (16.8, 18.1) | 99.2 (99.2, 99.2) |
|       | 24             | 1.9 (1.8, 1.9)    | 27.9 (27, 29)     | 98.4 (98.4, 98.5) | 16.6 (15.9, 17.1) | 99.2 (99.2, 99.2) |
|       | 25             | 2.1 (2, 2.1)      | 29.4 (28.4, 30.4) | 98.2 (98.2, 98.3) | 15.7 (15.2, 16.3) | 99.2 (99.2, 99.2) |
|       | 26             | 2.3 (2.2, 2.3)    | 30.8 (29.9, 31.9) | 98 (98, 98.1)     | 14.9 (14.4, 15.5) | 99.2 (99.2, 99.2) |
|       | 27             | 2.5 (2.5, 2.6)    | 32.3 (31.4, 33.3) | 97.8 (97.8, 97.8) | 14.1 (13.6, 14.6) | 99.2 (99.2, 99.3) |
|       | 28             | 2.8 (2.8, 2.8)    | 33.9 (32.9, 34.9) | 97.6 (97.5, 97.6) | 13.4 (12.9, 13.9) | 99.2 (99.2, 99.3) |
|       | 29             | 3.1 (3, 3.1)      | 35.3 (34.3, 36.4) | 97.3 (97.3, 97.3) | 12.7 (12.3, 13.1) | 99.3 (99.2, 99.3) |
|       | 30             | 3.4 (3.3, 3.4)    | 36.8 (35.8, 37.9) | 97 (97, 97)       | 12 (11.6, 12.4)   | 99.3 (99.3, 99.3) |
|       | 31             | 3.7 (3.7, 3.7)    | 38.2 (37.3, 39.3) | 96.7 (96.6, 96.7) | 11.4 (11, 11.7)   | 99.3 (99.3, 99.3) |
|       | 32             | 4.1 (4, 4.1)      | 39.6 (38.6, 40.7) | 96.3 (96.3, 96.4) | 10.8 (10.4, 11.1) | 99.3 (99.3, 99.3) |
|       | 33             | 4.4 (4.4, 4.5)    | 40.9 (39.9, 41.9) | 96 (95.9, 96)     | 10.2 (9.9, 10.5)  | 99.3 (99.3, 99.3) |
|       | 34             | 4.8 (4.8, 4.9)    | 42.1 (41.2, 43.2) | 95.6 (95.6, 95.6) | 9.6 (9.3, 9.9)    | 99.3 (99.3, 99.4) |
|       | 35             | 5.2 (5.2, 5.3)    | 43.5 (42.6, 44.6) | 95.2 (95.2, 95.2) | 9.1 (8.9, 9.4)    | 99.3 (99.3, 99.4) |
| 36    | 5.7 (5.6, 5.7) | 44.8 (43.6, 46)   | 94.7 (94.7, 94.8) | 8.7 (8.4, 8.9)    | 99.4 (99.3, 99.4) |                   |

| Score | Threshold | Positivity rate   | Sensitivity       | Specificity       | PPV            | NPV               |
|-------|-----------|-------------------|-------------------|-------------------|----------------|-------------------|
|       | 37        | 6.1 (6.1, 6.2)    | 46.1 (44.9, 47.3) | 94.3 (94.3, 94.3) | 8.3 (8, 8.5)   | 99.4 (99.3, 99.4) |
|       | 38        | 6.6 (6.6, 6.7)    | 47.3 (46.3, 48.5) | 93.8 (93.8, 93.9) | 7.9 (7.6, 8.1) | 99.4 (99.4, 99.4) |
|       | 39        | 7.1 (7.1, 7.2)    | 48.8 (47.7, 50)   | 93.3 (93.3, 93.4) | 7.5 (7.3, 7.7) | 99.4 (99.4, 99.4) |
|       | 40        | 7.7 (7.6, 7.7)    | 50.1 (49, 51.1)   | 92.8 (92.7, 92.8) | 7.2 (7, 7.4)   | 99.4 (99.4, 99.4) |
|       | 41        | 8.2 (8.2, 8.3)    | 51.2 (50.2, 52.2) | 92.3 (92.2, 92.3) | 6.9 (6.7, 7)   | 99.4 (99.4, 99.4) |
|       | 42        | 8.8 (8.7, 8.9)    | 52.3 (51.4, 53.4) | 91.7 (91.6, 91.7) | 6.6 (6.4, 6.7) | 99.4 (99.4, 99.4) |
|       | 43        | 9.4 (9.4, 9.5)    | 53.7 (52.6, 54.7) | 91.1 (91, 91.1)   | 6.3 (6.1, 6.5) | 99.4 (99.4, 99.5) |
|       | 44        | 10 (10, 10.1)     | 55 (54, 56)       | 90.5 (90.4, 90.5) | 6 (5.9, 6.2)   | 99.4 (99.4, 99.5) |
|       | 45        | 10.7 (10.7, 10.8) | 56.3 (55.2, 57.3) | 89.8 (89.7, 89.9) | 5.8 (5.6, 5.9) | 99.5 (99.4, 99.5) |
|       | 46        | 11.4 (11.3, 11.5) | 57.5 (56.5, 58.4) | 89.1 (89.1, 89.2) | 5.6 (5.4, 5.7) | 99.5 (99.5, 99.5) |
|       | 47        | 12.1 (12.1, 12.2) | 58.7 (57.7, 59.6) | 88.4 (88.3, 88.5) | 5.3 (5.2, 5.5) | 99.5 (99.5, 99.5) |
|       | 48        | 12.9 (12.8, 12.9) | 59.8 (58.7, 60.8) | 87.6 (87.6, 87.7) | 5.1 (5, 5.3)   | 99.5 (99.5, 99.5) |
|       | 49        | 13.7 (13.6, 13.7) | 61.1 (60, 62.1)   | 86.9 (86.8, 86.9) | 4.9 (4.8, 5.1) | 99.5 (99.5, 99.5) |
|       | 50        | 14.5 (14.4, 14.5) | 62.4 (61.2, 63.5) | 86 (86, 86.1)     | 4.7 (4.6, 4.9) | 99.5 (99.5, 99.5) |
|       | 51        | 15.4 (15.3, 15.4) | 63.5 (62.5, 64.5) | 85.2 (85.1, 85.2) | 4.6 (4.5, 4.7) | 99.5 (99.5, 99.5) |
|       | 52        | 16.3 (16.2, 16.3) | 64.6 (63.5, 65.6) | 84.3 (84.2, 84.3) | 4.4 (4.3, 4.5) | 99.5 (99.5, 99.5) |
|       | 53        | 17.2 (17.2, 17.3) | 65.9 (64.7, 66.8) | 83.3 (83.3, 83.4) | 4.2 (4.1, 4.3) | 99.5 (99.5, 99.6) |
|       | 54        | 18.2 (18.2, 18.3) | 67.1 (65.9, 68)   | 82.3 (82.3, 82.4) | 4.1 (4, 4.2)   | 99.6 (99.5, 99.6) |
|       | 55        | 19.3 (19.2, 19.3) | 68.3 (67.1, 69.3) | 81.3 (81.2, 81.3) | 3.9 (3.8, 4)   | 99.6 (99.5, 99.6) |
|       | 56        | 20.4 (20.3, 20.4) | 69.4 (68.4, 70.5) | 80.2 (80.1, 80.2) | 3.8 (3.7, 3.9) | 99.6 (99.6, 99.6) |
|       | 57        | 21.5 (21.5, 21.6) | 70.7 (69.6, 71.5) | 79 (78.9, 79.1)   | 3.6 (3.5, 3.7) | 99.6 (99.6, 99.6) |

MEWS, Modified Early Warning Score; NEWS, National Early Warning Score; RI, Rothman Index; EDI, Epic Deterioration Index; eCART, eCARTv5.

**eTable 5.** Detailed Encounter-Level Test Characteristics

| Score | Threshold     | Encounters with Alerts | Deteriorations Identified | Time to deterioration |
|-------|---------------|------------------------|---------------------------|-----------------------|
| eCART | 82            | 156814 (43.2%)         | 15671 (93.9%)             | 46 (11, 137)          |
|       | 83            | 151012 (41.6%)         | 15613 (93.5%)             | 45 (10, 135)          |
|       | 84            | 144965 (39.9%)         | 15558 (93.2%)             | 44 (10, 134)          |
|       | 85            | 138660 (38.2%)         | 15469 (92.7%)             | 43 (9, 131)           |
|       | 86            | 132228 (36.4%)         | 15373 (92.1%)             | 41 (9, 129)           |
|       | 87            | 125757 (34.7%)         | 15265 (91.4%)             | 40 (8, 126)           |
|       | 88            | 119016 (32.8%)         | 15169 (90.9%)             | 38 (7, 123)           |
|       | 89            | 112164 (30.9%)         | 15043 (90.1%)             | 36 (6, 120)           |
|       | 90            | 104890 (28.9%)         | 14906 (89.3%)             | 33 (5, 115)           |
|       | 91            | 97630 (26.9%)          | 14713 (88.1%)             | 31 (4, 111)           |
|       | 92            | 89992 (24.8%)          | 14520 (87%)               | 29 (4, 107)           |
|       | 93            | 82059 (22.6%)          | 14272 (85.5%)             | 26 (3, 101)           |
|       | 94            | 73761 (20.3%)          | 13989 (83.8%)             | 22 (2, 94)            |
|       | 95            | 65232 (18%)            | 13674 (81.9%)             | 19 (1, 88)            |
|       | 96            | 56373 (15.5%)          | 13269 (79.5%)             | 15 (1, 79)            |
|       | 97            | 46682 (12.9%)          | 12711 (76.1%)             | 11 (0, 69)            |
|       | 98            | 36378 (10%)            | 11879 (71.2%)             | 6 (0, 53)             |
|       | 99            | 24606 (6.8%)           | 10239 (61.3%)             | 2 (0, 30)             |
|       | EDI           | 34                     | 211685 (58.3%)            | 15499 (92.8%)         |
| 35    |               | 198172 (54.6%)         | 15315 (91.7%)             | 49 (11, 142)          |
| 36    |               | 184474 (50.8%)         | 15082 (90.3%)             | 46 (10, 139)          |
| 37    |               | 171036 (47.1%)         | 14835 (88.9%)             | 43 (8, 135)           |
| 38    |               | 157789 (43.5%)         | 14578 (87.3%)             | 40 (7, 131)           |
| 39    |               | 145162 (40%)           | 14287 (85.6%)             | 38 (5, 126)           |
| 40    |               | 132957 (36.6%)         | 14005 (83.9%)             | 34 (4, 121)           |
| 41    |               | 121471 (33.5%)         | 13685 (82%)               | 31 (3, 116)           |
| 42    |               | 110947 (30.6%)         | 13368 (80.1%)             | 27 (2, 110)           |
| 43    |               | 101441 (28%)           | 13060 (78.2%)             | 24 (1, 104)           |
| 44    |               | 92518 (25.5%)          | 12701 (76.1%)             | 21 (0, 97)            |
| 45    |               | 84298 (23.2%)          | 12359 (74%)               | 18 (0, 91)            |
| 46    |               | 76948 (21.2%)          | 11975 (71.7%)             | 15 (0, 86)            |
| 47    |               | 70265 (19.4%)          | 11591 (69.4%)             | 12 (0, 80)            |
| 48    |               | 64294 (17.7%)          | 11217 (67.2%)             | 9 (0, 74)             |
| 49    | 58809 (16.2%) | 10840 (64.9%)          | 7 (0, 68)                 |                       |
| 50    | 53879 (14.8%) | 10470 (62.7%)          | 5 (0, 62)                 |                       |
| 51    | 49347 (13.6%) | 10082 (60.4%)          | 3 (0, 56)                 |                       |
| 52    | 45250 (12.5%) | 9693 (58.1%)           | 2 (0, 50)                 |                       |
| 53    | 41538 (11.4%) | 9341 (56%)             | 1 (0, 44)                 |                       |

| Score | Threshold   | Encounters with Alerts | Deteriorations Identified | Time to deterioration |
|-------|-------------|------------------------|---------------------------|-----------------------|
|       | 54          | 37996 (10.5%)          | 8967 (53.7%)              | 1 (0, 39)             |
|       | 55          | 34922 (9.6%)           | 8594 (51.5%)              | 0 (0, 34)             |
|       | 56          | 32078 (8.8%)           | 8204 (49.1%)              | 0 (0, 29)             |
|       | 57          | 29344 (8.1%)           | 7824 (46.9%)              | 0 (0, 25)             |
|       | 58          | 26910 (7.4%)           | 7475 (44.8%)              | 0 (0, 21)             |
|       | 59          | 24626 (6.8%)           | 7112 (42.6%)              | 0 (0, 17)             |
| MEWS  | 2           | 259356 (71.5%)         | 15668 (93.9%)             | 50 (13, 143)          |
|       | 3           | 131572 (36.3%)         | 13792 (82.6%)             | 26 (2, 106)           |
|       | 4           | 60547 (16.7%)          | 10828 (64.9%)             | 5 (0, 56)             |
|       | 5           | 27093 (7.5%)           | 7572 (45.4%)              | 0 (0, 15)             |
| NEWS  | 3           | 227171 (62.6%)         | 15707 (94.1%)             | 51 (13, 144)          |
|       | 4           | 162504 (44.8%)         | 14960 (89.6%)             | 42 (8, 129)           |
|       | 5           | 115301 (31.8%)         | 14055 (84.2%)             | 31 (4, 110)           |
|       | 6           | 78088 (21.5%)          | 12785 (76.6%)             | 18 (0, 87)            |
|       | 7           | 51491 (14.2%)          | 11238 (67.3%)             | 8 (0, 63)             |
|       | 8           | 33557 (9.2%)           | 9542 (57.2%)              | 2 (0, 39)             |
| NEWS2 | 4           | 194371 (53.6%)         | 15457 (92.6%)             | 48 (12, 140)          |
|       | 5           | 148367 (40.9%)         | 14762 (88.4%)             | 40 (7, 128)           |
|       | 6           | 107208 (29.5%)         | 13719 (82.2%)             | 28 (3, 108)           |
|       | 7           | 74035 (20.4%)          | 12443 (74.5%)             | 17 (0, 86)            |
|       | 8           | 50512 (13.9%)          | 10924 (65.4%)             | 6 (0, 62)             |
|       | 9           | 32891 (9.1%)           | 9071 (54.3%)              | 1 (0, 37)             |
| RI    | 57          | 149287 (41.1%)         | 14529 (87%)               | 45 (8, 139)           |
|       | 56          | 143770 (39.6%)         | 14400 (86.3%)             | 44 (7, 138)           |
|       | 55          | 138266 (38.1%)         | 14250 (85.4%)             | 42 (6, 135)           |
|       | 54          | 133093 (36.7%)         | 14095 (84.4%)             | 41 (6, 134)           |
|       | 53          | 128120 (35.3%)         | 13945 (83.5%)             | 39 (5, 132)           |
|       | 52          | 123157 (33.9%)         | 13770 (82.5%)             | 38 (4, 130)           |
|       | 51          | 118334 (32.6%)         | 13616 (81.6%)             | 37 (4, 129)           |
|       | 50          | 113595 (31.3%)         | 13465 (80.7%)             | 35 (3, 127)           |
|       | 49          | 109036 (30%)           | 13283 (79.6%)             | 33 (2, 124)           |
|       | 48          | 104476 (28.8%)         | 13096 (78.5%)             | 32 (2, 122)           |
|       | 47          | 100006 (27.6%)         | 12912 (77.3%)             | 30 (1, 119)           |
|       | 46          | 95741 (26.4%)          | 12734 (76.3%)             | 28 (1, 118)           |
|       | 45          | 91679 (25.3%)          | 12567 (75.3%)             | 26 (0, 115)           |
|       | 44          | 87519 (24.1%)          | 12395 (74.3%)             | 25 (0, 111)           |
|       | 43          | 83737 (23.1%)          | 12194 (73%)               | 23 (0, 109)           |
|       | 42          | 79886 (22%)            | 11989 (71.8%)             | 22 (0, 107)           |
|       | 41          | 76287 (21%)            | 11805 (70.7%)             | 20 (0, 104)           |
| 40    | 72739 (20%) | 11603 (69.5%)          | 19 (0, 101)               |                       |

| Score | Threshold | Encounters with Alerts | Deteriorations Identified | Time to deterioration |
|-------|-----------|------------------------|---------------------------|-----------------------|
|       | 39        | 69298 (19.1%)          | 11409 (68.3%)             | 17 (0, 99)            |
|       | 38        | 66056 (18.2%)          | 11207 (67.1%)             | 15 (0, 95)            |
|       | 37        | 62787 (17.3%)          | 10975 (65.7%)             | 13 (0, 92)            |
|       | 36        | 59673 (16.4%)          | 10760 (64.5%)             | 12 (0, 88)            |
|       | 35        | 56572 (15.6%)          | 10536 (63.1%)             | 10 (0, 85)            |
|       | 34        | 53633 (14.8%)          | 10302 (61.7%)             | 9 (0, 82)             |
|       | 33        | 50819 (14%)            | 10075 (60.4%)             | 7 (0, 78)             |
|       | 32        | 48032 (13.2%)          | 9863 (59.1%)              | 6 (0, 74)             |
|       | 31        | 45375 (12.5%)          | 9641 (57.8%)              | 4 (0, 71)             |
|       | 30        | 42761 (11.8%)          | 9414 (56.4%)              | 3 (0, 67)             |
|       | 29        | 40321 (11.1%)          | 9158 (54.9%)              | 2 (0, 62)             |
|       | 28        | 37922 (10.4%)          | 8931 (53.5%)              | 2 (0, 58)             |
|       | 27        | 35621 (9.8%)           | 8718 (52.2%)              | 1 (0, 54)             |
|       | 26        | 33368 (9.2%)           | 8485 (50.8%)              | 0 (0, 50)             |
|       | 25        | 31148 (8.6%)           | 8187 (49%)                | 0 (0, 46)             |
|       | 24        | 29036 (8%)             | 7927 (47.5%)              | 0 (0, 42)             |
|       | 23        | 27076 (7.5%)           | 7692 (46.1%)              | 0 (0, 38)             |
|       | 22        | 25190 (6.9%)           | 7449 (44.6%)              | 0 (0, 33)             |
|       | 21        | 23446 (6.5%)           | 7199 (43.1%)              | 0 (0, 29)             |
|       | 20        | 21697 (6%)             | 6941 (41.6%)              | 0 (0, 26)             |

MEWS, Modified Early Warning Score; NEWS, National Early Warning Score; RI, Rothman Index; EDI, Epic Deterioration Index; eCART, eCARTv5.

**eFigure.** Receiver Operator Characteristics Curves

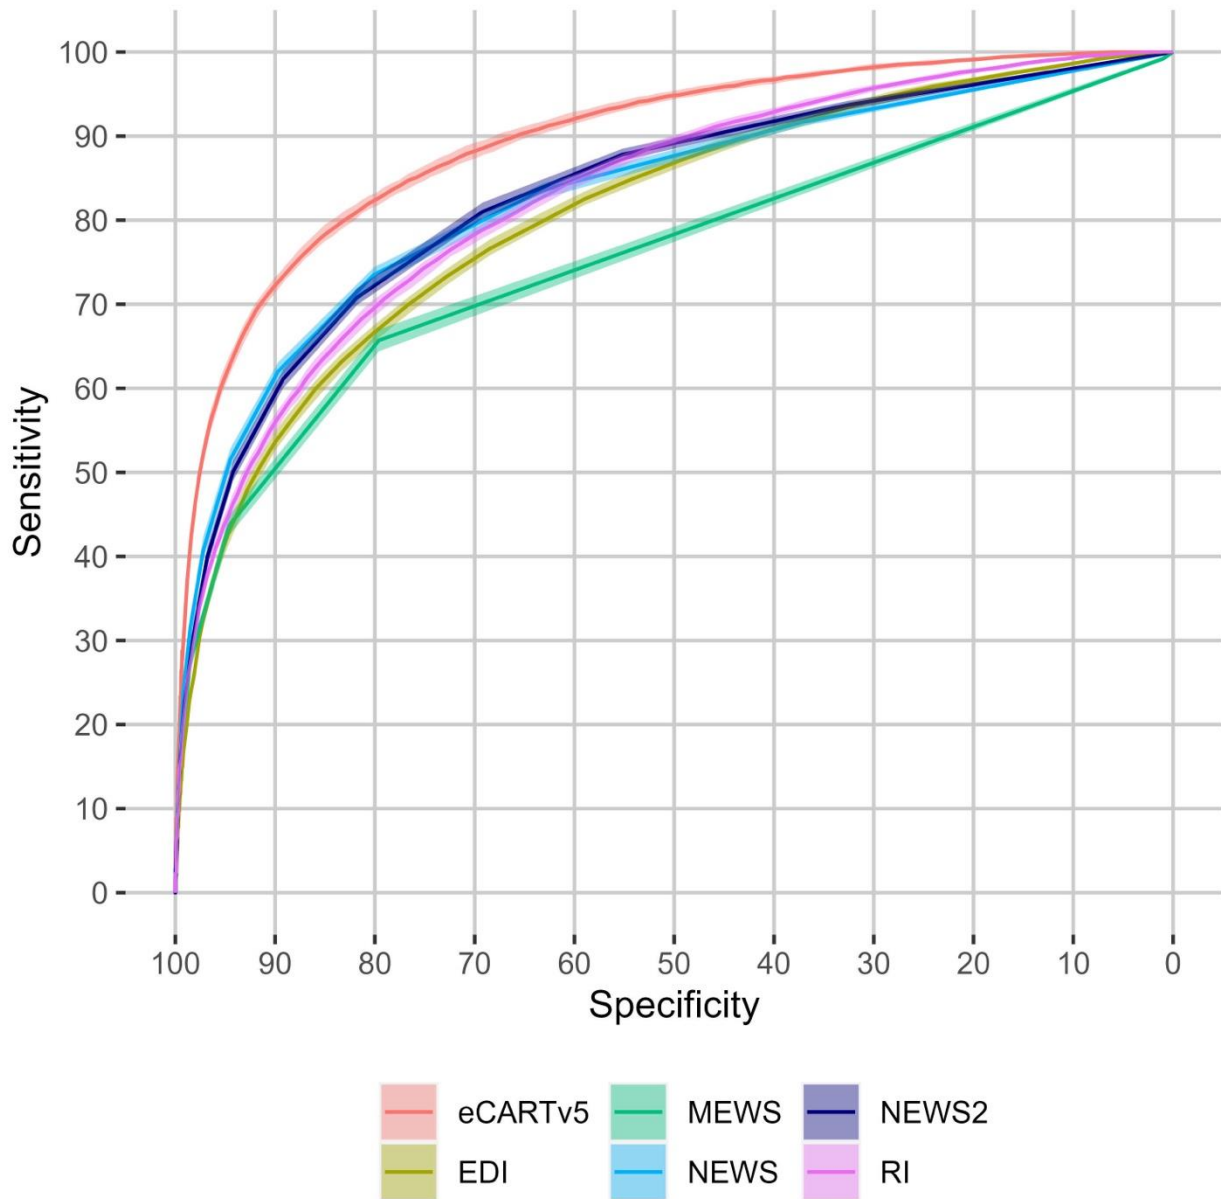

MEWS, Modified Early Warning Score; NEWS, National Early Warning Score; RI, Rothman Index; EDI, Epic Deterioration Index; eCART, eCARTv5. Shading represents the 95% confidence intervals.
