# Supplementary material for: Early Warning Scores With and Without Artificial Intelligence
Source: PubMed Central journal article supplement (PMC11544488; doi:10.1001/jamanetworkopen.2024.38986), 2024-10-15
Supplement: jamanetwopen-e2438986-s002.pdf [file jamanetwopen-e2438986-s002.pdf]

## Data Sharing Statement

Edelson. Early Warning Scores With and Without Artificial Intelligence. *JAMA Netw Open*.  
Published October 15, 2024. doi:10.1001/jamanetworkopen.2024.38986

### Data

**Data available:** No
